# Supplementary material for: Skin CD4+ Memory T Cells Play an Essential Role in Acquired Anti-Tick Immunity through Interleukin-3-Mediated Basophil Recruitment to Tick-Feeding Sites
Source: PubMed Central journal article supplement (PMC5650685; doi:10.3389/fimmu.2017.01348), 2017-10-16
Supplement: image_1.pdf [file image_1.pdf]

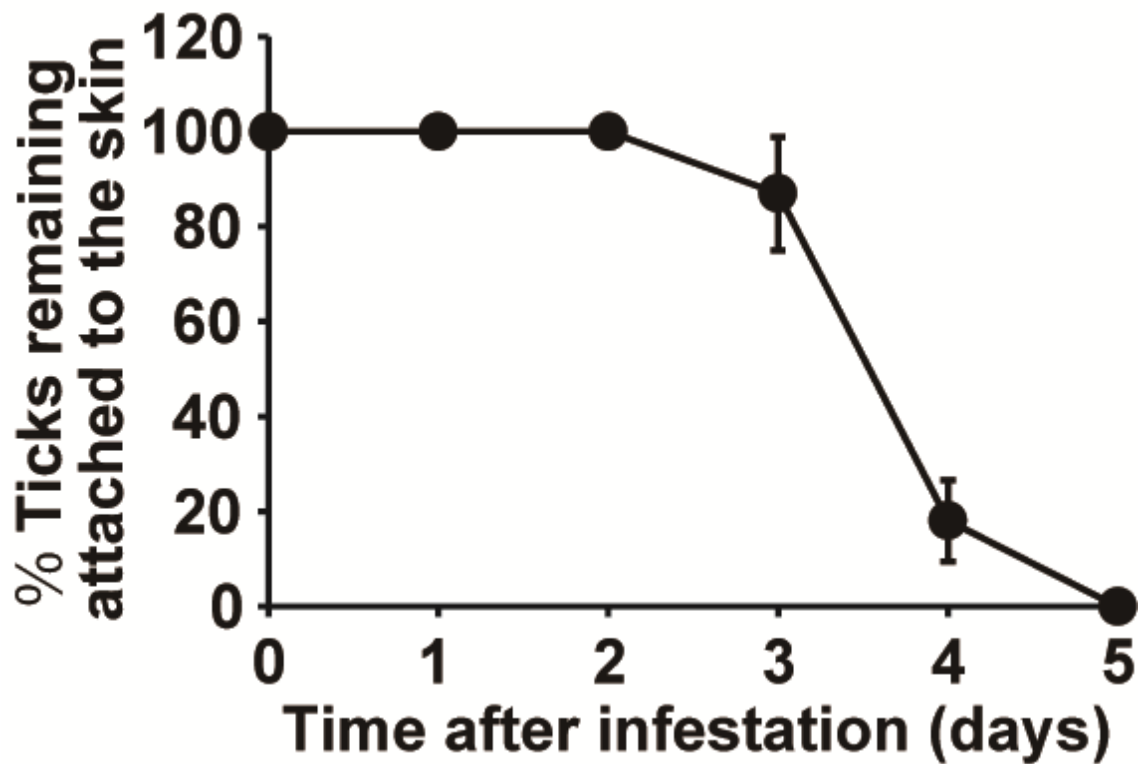

**Fig. S1. Time course of the number of ticks staying attached to the skin during the 2<sup>nd</sup> infestation** C57BL/6 mice were infested twice with ticks as in Fig. 1A, and the number of ticks staying attached to the skin (mean  $\pm$  SEM, n=4 each) was counted at the indicated time points. The proportion (%) of skin-attached ticks at each point was calculated and displayed where the number of skin-attached ticks on day 0 of infestation is set as 100%. Data shown are representative of 2 independent experiments.
