# Supplementary material for: Skin CD4+ Memory T Cells Play an Essential Role in Acquired Anti-Tick Immunity through Interleukin-3-Mediated Basophil Recruitment to Tick-Feeding Sites
Source: PubMed Central journal article supplement (PMC5650685; doi:10.3389/fimmu.2017.01348), 2017-10-16
Supplement: image_2.pdf [file image_2.pdf]

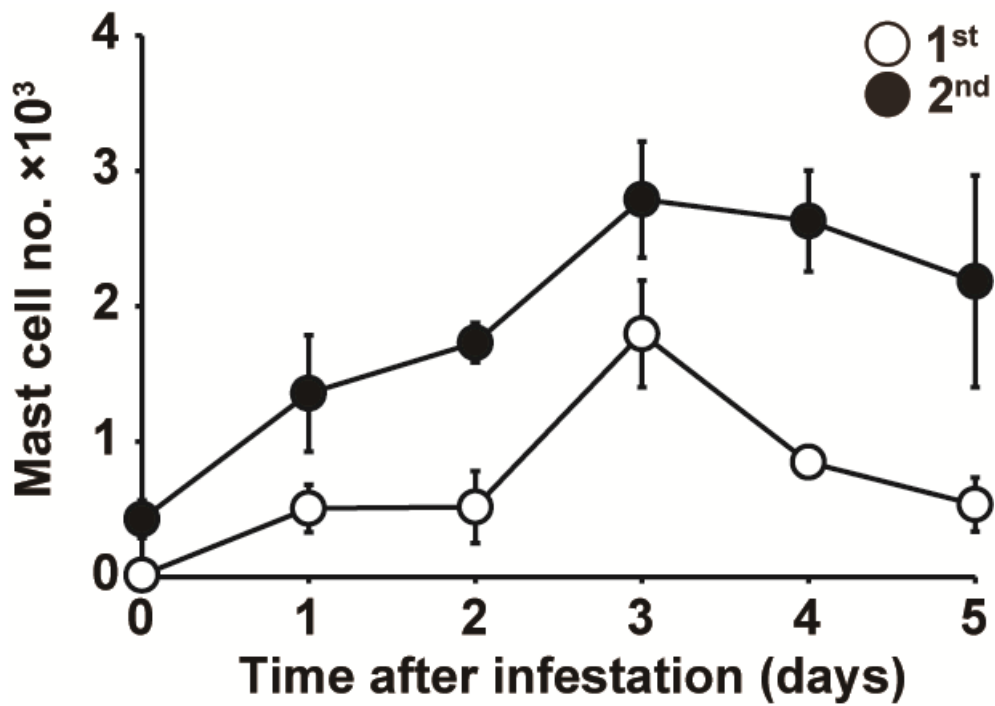

**Fig. S2. Time course of the number of mast cells at tick-feeding sites during infestation**

C57BL/6 mice were infested once or twice with ticks as in Fig. 1A. The number of mast cells at tick-feeding sites (mean  $\pm$  SEM,  $n=3$  each) was counted at the indicated time points during the 1<sup>st</sup> (white circles) and 2<sup>nd</sup> (black circles) infestations. Data shown are representative of 2 independent experiments.
