# Supplementary material for: Skin CD4+ Memory T Cells Play an Essential Role in Acquired Anti-Tick Immunity through Interleukin-3-Mediated Basophil Recruitment to Tick-Feeding Sites
Source: PubMed Central journal article supplement (PMC5650685; doi:10.3389/fimmu.2017.01348), 2017-10-16
Supplement: image_3.pdf [file image_3.pdf]

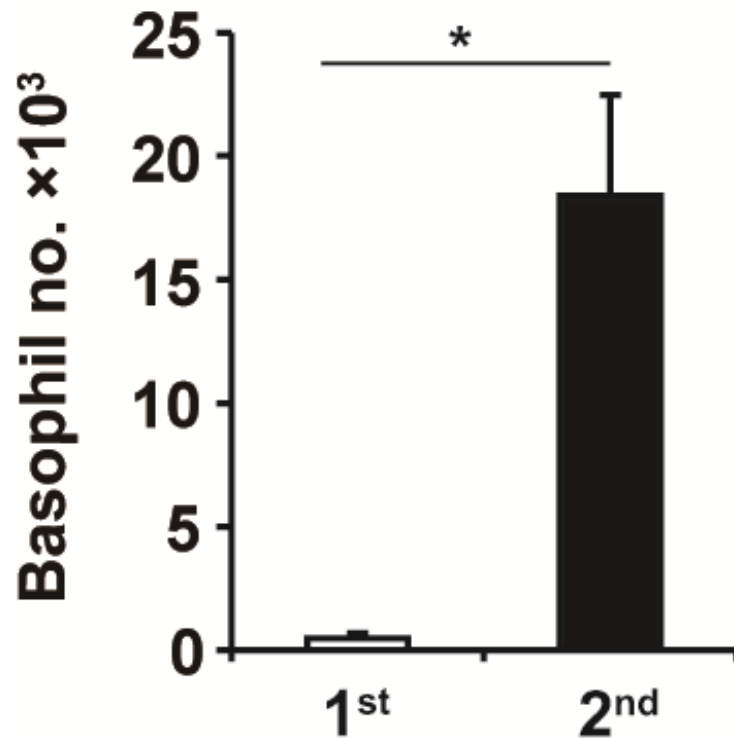

**Fig. S3. No significant accumulation of basophils at the 1<sup>st</sup> tick-feeding site in *Rag2*<sup>-/-</sup> mice into which CD4<sup>+</sup> T cells from WT mice were adoptively transferred**

CD4<sup>+</sup> T cells from WT mice were adoptively transferred to *Rag2*<sup>-/-</sup> mice as shown in Fig. 2C. Recipient mice were infested once or twice with ticks, and the number of basophils at tick-feeding site was examined on day 2 of infestation (mean  $\pm$  SEM, n=4 each). Data shown are representative of 2 independent experiments. \* $P$ <0.05.
