# Supplementary material for: Skin CD4+ Memory T Cells Play an Essential Role in Acquired Anti-Tick Immunity through Interleukin-3-Mediated Basophil Recruitment to Tick-Feeding Sites
Source: PubMed Central journal article supplement (PMC5650685; doi:10.3389/fimmu.2017.01348), 2017-10-16
Supplement: image_4.pdf [file image_4.pdf]

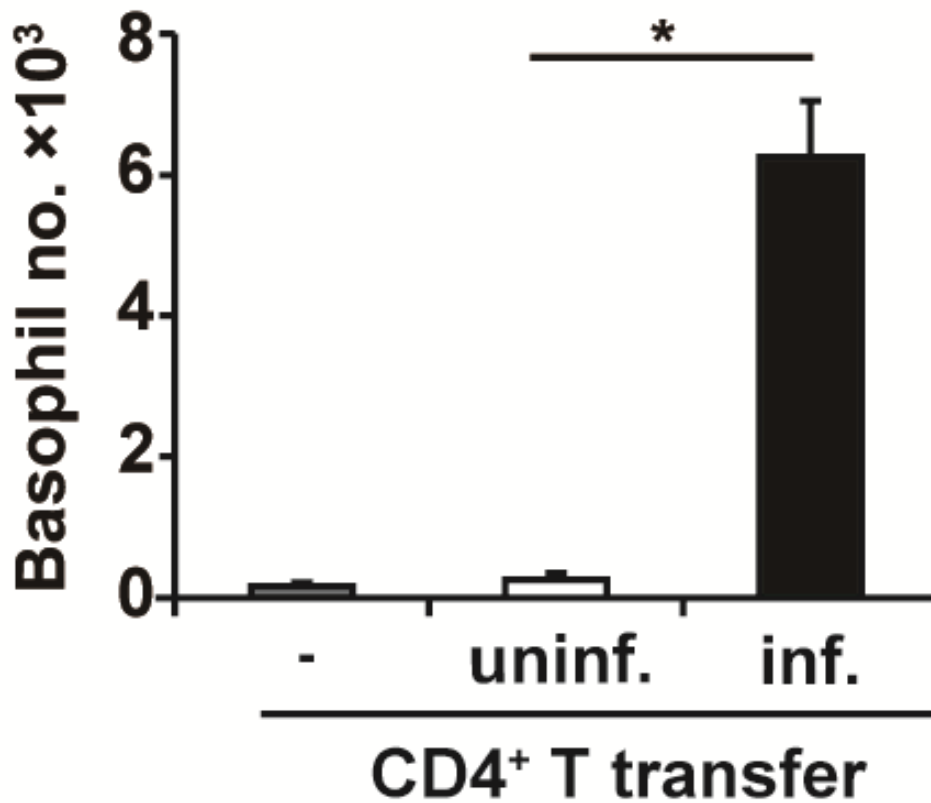

**Fig. S4. Adoptive transfer of CD4<sup>+</sup> T cells isolated from previously tick-infested mice confers basophil accumulation at the tick-feeding site even in the 1<sup>st</sup> infestation on *Rag2*<sup>-/-</sup> mice**

CD4<sup>+</sup> T cells were isolated from uninfested mice or mice infested once with ticks 14 days before, and adoptively transferred to *Rag2*<sup>-/-</sup> mice. Recipient mice were infested once with ticks 7 days later, and the number of basophils (mean ± SEM, n=4 each) at the tick-feeding site was examined on day 2 of infestation. As a control, *Rag2*<sup>-/-</sup> mice without T cell transfer were similarly infested and analyzed.

Data shown are representative of 2 independent experiments. \**P*<0.05.
