# Supplementary material for: Skin CD4+ Memory T Cells Play an Essential Role in Acquired Anti-Tick Immunity through Interleukin-3-Mediated Basophil Recruitment to Tick-Feeding Sites
Source: PubMed Central journal article supplement (PMC5650685; doi:10.3389/fimmu.2017.01348), 2017-10-16
Supplement: image_5.pdf [file image_5.pdf]

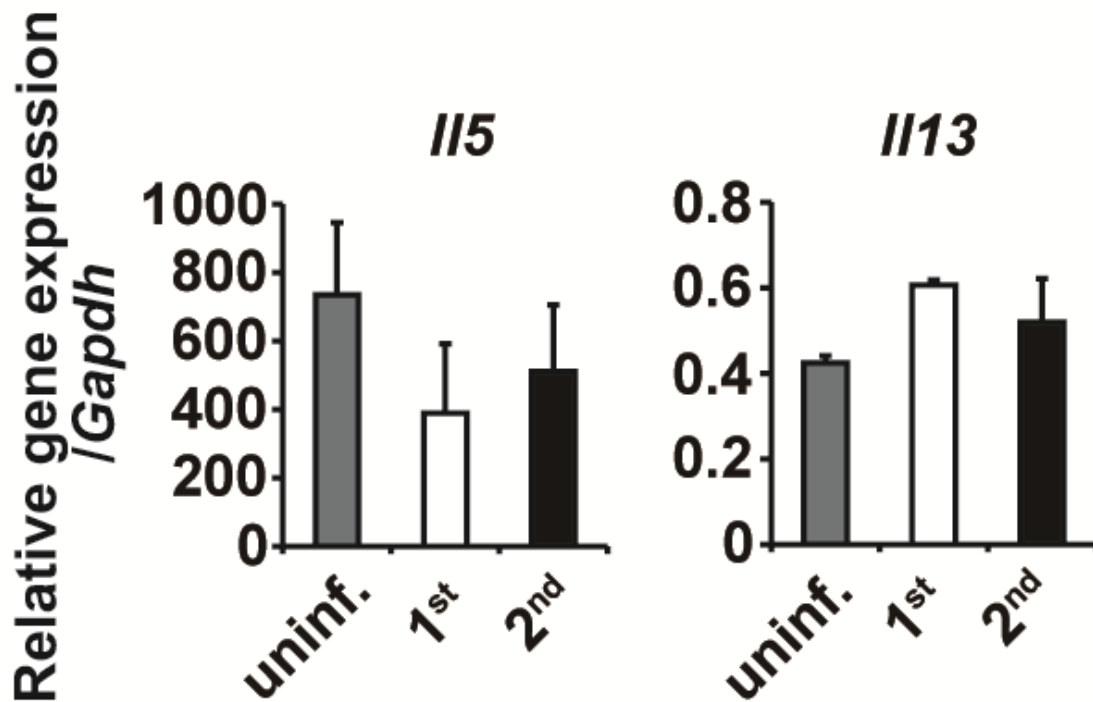

**Fig. S5. No significant upregulation of *I15* and *I13* expression at the tick-feeding site**

The transcriptional expression of *I15* and *I13* at uninfested skin, 1<sup>st</sup> or 2<sup>nd</sup> tick-feeding site on day 2 of infestation is shown (mean  $\pm$  SEM, n=3 each). Data shown are representative of 2 independent experiments.
