# Supplementary material for: Skin CD4+ Memory T Cells Play an Essential Role in Acquired Anti-Tick Immunity through Interleukin-3-Mediated Basophil Recruitment to Tick-Feeding Sites
Source: PubMed Central journal article supplement (PMC5650685; doi:10.3389/fimmu.2017.01348), 2017-10-16
Supplement: image_6.pdf [file image_6.pdf]

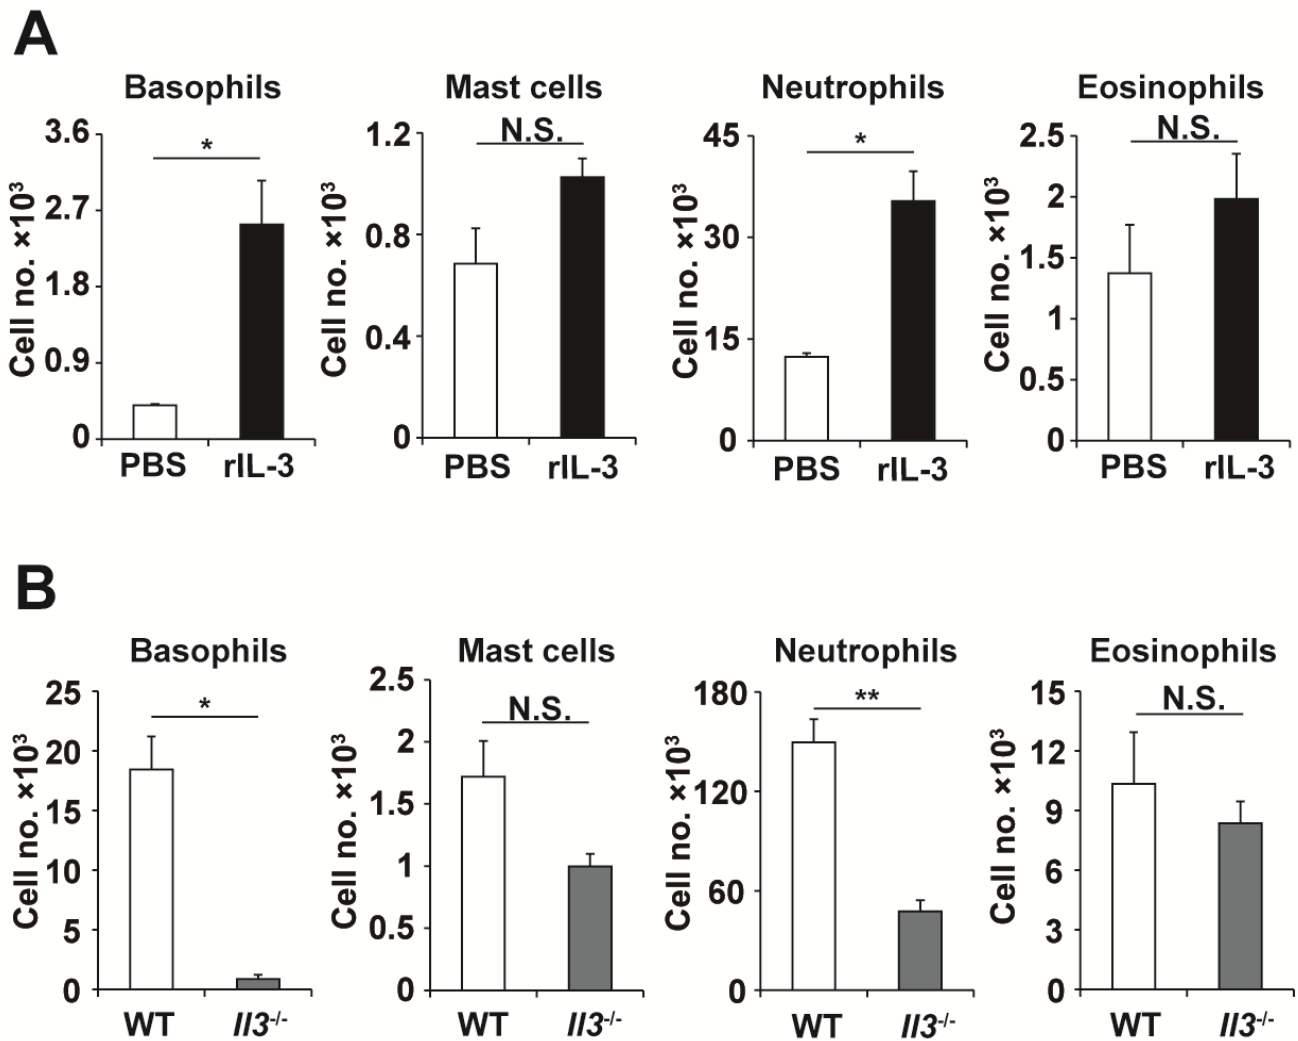

**Fig. S6. CD4<sup>+</sup> T cell-derived IL-3 contributes to the accumulation of basophils and neutrophils at the 2<sup>nd</sup> tick-feeding sites**

(A) *Rag2*<sup>-/-</sup> mice were treated with rIL-3 or control PBS and infested once with ticks as shown in Fig. 3D. The numbers of basophils, mast cells, neutrophils and eosinophils (mean ± SEM, n=4 each) at the 1<sup>st</sup> tick-feeding site of each side of flank were examined on day 2 of infestation. (B) CD4<sup>+</sup> T cells from WT or *Il3*<sup>-/-</sup> mice were adoptively transferred into *Rag2*<sup>-/-</sup> mice, and recipient mice were infested twice with ticks as shown in Fig. 4A. The number of basophils, mast cells, neutrophils and eosinophils at the 2<sup>nd</sup> tick-feeding site was examined on day 2 of infestation (mean ± SEM, n=4 each). Data shown are representative of 2 independent experiments. N.S., not significant; \**P*<0.05; \*\**P*<0.01.
