# Supplementary material for: Skin CD4+ Memory T Cells Play an Essential Role in Acquired Anti-Tick Immunity through Interleukin-3-Mediated Basophil Recruitment to Tick-Feeding Sites
Source: PubMed Central journal article supplement (PMC5650685; doi:10.3389/fimmu.2017.01348), 2017-10-16
Supplement: image_7.pdf [file image_7.pdf]

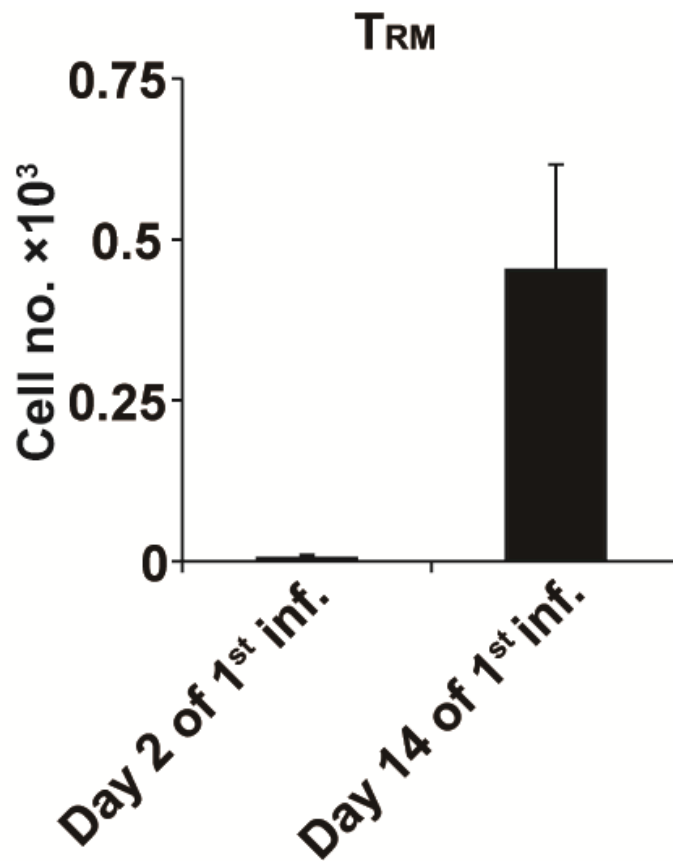

**Fig. S7. CD4<sup>+</sup> T<sub>RM</sub> cells can be detected at previously-uninfested skin on day 14 of the 1<sup>st</sup> infestation in *Rag2*<sup>-/-</sup> mice that received CD4<sup>+</sup> T cells from WT mice**

CD4<sup>+</sup> T cells from WT mice were adoptively transferred into *Rag2*<sup>-/-</sup> mice, and recipient mice were infested once with ticks. On day 2 or day 14 of infestation, previously-uninfested skin was isolated from the opposite flank to examine the number of CD4<sup>+</sup> T<sub>RM</sub> cells (mean ± SEM, n=3 each). Data shown are representative of 2 independent experiments.
